# Supplementary material
Source: PubMed Central journal article supplement (PMC7745997)
Supplement: ry20203557suppa1.pdf [file ry20203557suppa1.pdf]

## Supplemental Materials

### Supplemental Appendix. Search terms used in database

#### 1) Search terms for PubMed

((("COVID-19"[Supplementary Concept] OR "Coronavirus"[MeSH Terms]) OR "severe acute respiratory syndrome coronavirus 2"[Supplementary Concept]) OR (((("Coronavirus"[MeSH Terms] OR "Coronavirus"[All Fields]) OR "coronaviruses"[All Fields]) OR ((((((("COVID-19"[All Fields] OR "covid 2019"[All Fields]) OR "severe acute respiratory syndrome coronavirus 2"[Supplementary Concept]) OR "severe acute respiratory syndrome coronavirus 2"[All Fields]) OR "2019 ncov"[All Fields]) OR "sars cov 2"[All Fields]) OR "2019ncov"[All Fields]) OR (("wuhan"[All Fields] AND ("Coronavirus"[MeSH Terms] OR "Coronavirus"[All Fields]))))) OR (("severe acute respiratory syndrome coronavirus 2"[Supplementary Concept] OR "severe acute respiratory syndrome coronavirus 2"[All Fields]) OR "2019 ncov"[All Fields]) OR (("severe acute respiratory syndrome coronavirus 2"[Supplementary Concept] OR "severe acute respiratory syndrome coronavirus 2"[All Fields]) OR "sars cov 2"[All Fields])))) AND (("embol\*"[All Fields] OR "thromb\*"[All Fields]) OR ("Embolism"[MeSH Terms] OR "Thrombosis"[MeSH Terms]))

-Filter: English, from 2020 - 2020

#### 2) Search terms for Embase

((('coronavirus infection'/exp OR 'coronavirus disease 2019'/exp OR 'severe acute respiratory syndrome coronavirus 2'/exp) OR (coronavirus OR 'covid 19' OR '2019 ncov' OR 'sars cov 2')) AND ((embol\* OR thromb\*) OR ('embolism'/exp OR 'thromboembolism'/exp OR 'thrombosis'/exp)) AND [english]/lim AND [2020-2020]/py

#### 3) Search terms for Cochrane Library

"coronavirus" OR "COVID-19" OR "2019-nCoV" OR "SARS-COV-2" OR MeSH descriptor: [Coronavirus] explode all trees

AND

embol\* OR thromb\* OR embol\* OR thromb\* OR MeSH descriptor: [Embolism and Thrombosis] explode all trees

with Cochrane Library publication date from Jan 2020 to Dec 2020

#### 4) Search terms for SSRN

†The SSRN does not provide a combination of search terms, and we used keywords related to thromboembolism without COVID-19 in recent 6 months.

emboli OR embolic OR embolism OR thrombi OR thrombus OR thrombosis

#### 5) Search terms for medRxiv and bioRxiv

†The medRxiv and bioRxiv do not provide a combination of search terms, and we used keywords related to thromboembolism without COVID-19 since Jan 2020.

emboli OR embolic OR embolism OR thrombi OR thrombus OR thrombosis

## Supplemental Tables

**Table 1. Quality assessment of the included studies**

| First author          | Selection                                |                                     |                           |                                                                          | Comparability | Outcome                                                         |                       |                                                 | Total score |
|-----------------------|------------------------------------------|-------------------------------------|---------------------------|--------------------------------------------------------------------------|---------------|-----------------------------------------------------------------|-----------------------|-------------------------------------------------|-------------|
|                       | Representativeness of the exposed cohort | Selection of the non-exposed cohort | Ascertainment of exposure | Demonstration that outcome of interest was not present at start of study |               | Comparability of cohorts on the basis of the design or analysis | Assessment of outcome | Was follow-up long enough for outcomes to occur |             |
| Grillet (23)          | 1                                        | 0                                   | 1                         | 0                                                                        | 1             | 1                                                               | 1                     | 1                                               | 6           |
| Leonard-Lorant (7)    | 0                                        | 1                                   | 1                         | 0                                                                        | 0             | 1                                                               | 1                     | 1                                               | 5           |
| Gervaise (21)         | 0                                        | 0                                   | 1                         | 0                                                                        | 0             | 1                                                               | 1                     | 1                                               | 4           |
| Klok (27)             | 1                                        | 0                                   | 0                         | 0                                                                        | 0             | 1                                                               | 1                     | 1                                               | 4           |
| Al-Samkari (13)       | 1                                        | 0                                   | 1                         | 0                                                                        | 2             | 1                                                               | 1                     | 1                                               | 7           |
| Zhang (37)            | 1                                        | 0                                   | 0                         | 1                                                                        | 2             | 1                                                               | 1                     | 1                                               | 7           |
| Ren (35)              | 1                                        | 0                                   | 0                         | 1                                                                        | 0             | 1                                                               | 1                     | 1                                               | 5           |
| Llitjos (28)          | 1                                        | 0                                   | 1                         | 1                                                                        | 0             | 1                                                               | 1                     | 1                                               | 6           |
| Helms (25)            | 1                                        | 1                                   | 1                         | 1                                                                        | 1             | 1                                                               | 1                     | 1                                               | 8           |
| Demelo-Rodríguez (18) | 1                                        | 0                                   | 1                         | 1                                                                        | 2             | 1                                                               | 1                     | 1                                               | 8           |
| Middeldorp (32)       | 1                                        | 0                                   | 1                         | 1                                                                        | 2             | 1                                                               | 1                     | 1                                               | 8           |

|                  |   |   |   |   |   |   |   |   |   |
|------------------|---|---|---|---|---|---|---|---|---|
| Cui (17)         | 1 | 0 | 1 | 0 | 0 | 1 | 1 | 1 | 5 |
| Poissy (33)      | 1 | 1 | 1 | 0 | 0 | 1 | 1 | 1 | 6 |
| Bompard (15)     | 1 | 0 | 1 | 0 | 0 | 1 | 1 | 1 | 5 |
| Cattaneo (16)    | 0 | 0 | 0 | 1 | 0 | 1 | 1 | 1 | 4 |
| Maatman (30)     | 1 | 0 | 1 | 0 | 0 | 1 | 1 | 1 | 5 |
| Hékimian (24)    | 1 | 0 | 1 | 0 | 0 | 1 | 1 | 1 | 5 |
| Artifoni (14)    | 1 | 0 | 1 | 0 | 0 | 1 | 1 | 1 | 5 |
| Grandmaison (22) | 1 | 0 | 1 | 1 | 0 | 1 | 1 | 1 | 6 |
| Fraissé (20)     | 1 | 0 | 1 | 1 | 0 | 1 | 1 | 1 | 6 |
| Lodigiani (29)   | 1 | 0 | 1 | 1 | 0 | 1 | 1 | 1 | 6 |
| Longchamp (38)   | 1 | 0 | 1 | 1 | 0 | 1 | 1 | 1 | 6 |
| Poyiadiji (34)   | 1 | 0 | 1 | 1 | 2 | 1 | 1 | 1 | 8 |
| Fang (19)        | 0 | 0 | 1 | 0 | 0 | 1 | 1 | 1 | 4 |
| Valle (36)       | 0 | 0 | 1 | 0 | 0 | 1 | 1 | 1 | 4 |
| Manjunath (31)   | 1 | 0 | 1 | 0 | 0 | 1 | 1 | 1 | 5 |
| Kerbikov (26)    | 1 | 0 | 1 | 1 | 2 | 1 | 1 | 1 | 8 |



Table 2. Incidence PE and DVT in each subgroup by disease severity.

| First author          | No.of patients | Disease Severity   | Use of anticoagulation | Endpoints | Proportion of patients undergoing CTPA (%) | Incidence of PE (%) | Incidence of DVT* (%) |
|-----------------------|----------------|--------------------|------------------------|-----------|--------------------------------------------|---------------------|-----------------------|
| Grillet_1 (23)        | 61             | non-ICU            | Unknown                | PE        | 100                                        | 9.8                 | N/A                   |
| Grillet_2 (23)        | 39             | ICU                | Unknown                | PE        | 100                                        | 43.6                | N/A                   |
| Leonard-Lorant_1 (7)  | 58             | non-ICU            | Yes                    | PE        | 100                                        | 13.8                | N/A                   |
| Leonard-Lorant_2 (7)  | 48             | ICU                | Yes                    | PE        | 100                                        | 50.0                | N/A                   |
| Gervaise_1 (21)       | 31             | moderate           | No                     | PE        | 100                                        | 16.1                | N/A                   |
| Gervaise_2 (21)       | 41             | severe or critical | No                     | PE        | 100                                        | 19.5                | N/A                   |
| Klok (27)             | 184            | ICU                | Yes                    | PE, DVT   | Unknown                                    | 35.3                | 0.5                   |
| Al-Samkari (13)       | 400            | Various            | Yes                    | PE, DVT   | Unknown                                    | 2.5                 | 2.5                   |
| Zhang_1 (37)          | 78             | Various            | Yes                    | PE, DVT   | <100*                                      | N/A                 | 29.5                  |
| Zhang_2 (37)          | 65             |                    | Yes                    | PE, DVT   | <100*                                      | N/A                 | 66.2                  |
| Ren (35)              | 48             | ICU                | Yes                    | DVT       | N/A                                        | N/A                 | 85.4                  |
| Llitjos (28)          | 26             | ICU                | Yes                    | PE, DVT   | Unknown                                    | 23.1                | 50.0                  |
| Helms (25)            | 150            | ICU                | Yes                    | PE, DVT   | 66.7                                       | 16.7                | 2.0                   |
| Demelo-Rodríguez (18) | 156            | Non-ICU            | Yes                    | DVT       | N/A                                        | N/A                 | 14.7                  |
| Middeldorp_1 (32)     | 123            | non-ICU            | Yes                    | PE, DVT   | Unknown                                    | 1.6                 | 2.0                   |
| Middeldorp_2 (32)     | 75             | ICU                | Yes                    | PE, DVT   | Unknown                                    | 14.7                | 31.0                  |
| Cui (17)              | 81             | ICU                | No                     | DVT       | N/A                                        | N/A                 | 24.7                  |
| Poissy (33)           | 107            | ICU                | Yes                    | PE, DVT   | 31.8                                       | 20.6                | 4.7                   |

|                  |     |                                        |     |         |         |      |      |
|------------------|-----|----------------------------------------|-----|---------|---------|------|------|
| Bompard_1 (15)   | 111 | Non-ICU                                | Yes | PE      | 100     | 18.0 | N/A  |
| Bompard_2 (15)   | 24  | non-ICU                                | Yes | PE      | 100     | 50.0 | N/A  |
| Cattaneo (16)    | 64  | Non-ICU                                | Yes | DVT     | N/A     | N/A  | 0.0  |
| Maatman (30)     | 109 | ICU                                    | Yes | PE, DVT | Unknown | 4.6  | 22.0 |
| Hékimian (24)    | 51  | ICU                                    | Yes | PE      | 64.7    | 15.7 | N/A  |
| Artifoni (14)    | 71  | Non-ICU                                | Yes | PE, DVT | 45.1    | 9.9  | 21.1 |
| Grandmaison (22) | 29  | ICU                                    | Yes | PE, DVT | 41.4    | 6.9  | 58.6 |
| Fraissé (20)     | 92  | ICU                                    | Yes | PE, DVT | 29.3    | 28.3 | 13.0 |
| Lodigiani_1 (29) | 314 | Non-ICU                                | Yes | PE, DVT | <100*   | 2.5  | 1.6  |
| Lodigiani_2 (29) | 48  | ICU                                    | Yes | PE, DVT | <100*   | 4.2  | 2.1  |
| Longchamp (38)   | 25  | ICU                                    | Yes | PE, DVT | 36.0    | 24.0 | 24.0 |
| Poyiadiji_1 (34) | 246 | Non-ICU                                | Yes | PE      | 100     | 22.0 | N/A  |
| Poyiadiji_2 (34) | 82  | ICU                                    | Yes | PE      | 100     | 22.0 | N/A  |
| Fang_1 (19)      | 73  | Non-ICU                                | Yes | PE      | 100     | 38.4 | N/A  |
| Fang_2 (19)      | 20  | ICU                                    | Yes | PE      | 100     | 65.0 | N/A  |
| Valle (36)       | 114 | Various (severe)                       | Yes | PE      | 100     | 57.0 | N/A  |
| Manjunath (31)   | 23  | Critically ill (ICU or step down unit) | Yes | PE      | 43.5    | 26.1 | N/A  |
| Kerbikov (26)    | 75  | Moderate to severe (non-ICU)           | Yes | DVT     | N/A     | N/A  | 20.0 |

Note.— CTPA, CT pulmonary angiography; PE, pulmonary embolism; DVT, deep vein thrombosis; ICU, intensive care unit; N/A, non-applicable

\*The exact number for each subgroup was not provided in the included study.

Table 3. Information about PE location

| First author   | Endpoints | Incidence of PE (%) | PE location                                          |
|----------------|-----------|---------------------|------------------------------------------------------|
| Grillet        | PE        | 23.0                | 10 lobar, 23 segmental                               |
| Leonard-Lorant | PE        | 30.2                | 7 main, 11 lobar, 9 segmental, 5 subsegmental        |
| Gervaise       | PE        | 18.1                | 2 main, 4 lobar, 7 segmental                         |
| Klok           | PE, DVT   | 35.3                | 46 segmental or proximal, 19 subsegmental†           |
| Al-Samkari     | PE, DVT   | 2.5                 | 6 proximal, 1 distal, 3 missing value†               |
| Zhang          | PE, DVT   | 0.7                 | N/A                                                  |
| Llitjos        | PE, DVT   | 23.1                | N/A                                                  |
| Helms          | PE, DVT   | 16.7                | 9 troncular, 8 lobar, 5 segmental, 3 subsegmental    |
| Middeldorp     | PE, DVT   | 6.6                 | 1 central or lobar, 10 segmental, 2 subsegmental     |
| Poissy         | PE, DVT   | 20.6                | 2 proximal, 10 segmental, 7 subsegmental , 3 missing |
| Bompard        | PE        | 23.7                | 10 proximal , 18 segmental, 4 subsegmental           |
| Maatman        | PE, DVT   | 4.6                 | N/A                                                  |
| Hékimian       | PE        | 15.7                | 4 main, 3 segmental                                  |
| Artifoni       | PE, DVT   | 9.9                 | 1 main, 1 lobar, 2 segmental, 3 subsegmental         |
| Grandmaison    | PE, DVT   | 6.9                 | 2 main                                               |
| Fraissé        | PE, DVT   | 28.3                | 5 main, 6 lobar, 15 segmental                        |
| Lodigiani      | PE, DVT   | 2.8                 | N/A                                                  |
| Longchamp      | PE, DVT   | 24.0                | lobar 3, segmental 3                                 |
| Poyiadji       | PE        | 22.0                | 9 central, 22 lobar, 37 segmental, 4 subsegmental    |



|           |    |      |                                                |
|-----------|----|------|------------------------------------------------|
| Fang      | PE | 44.1 | 5 main, 8 lobar, 16 segmental, 12 subsegmental |
| Valle     | PE | 57.0 | 11 main                                        |
| Manjunath | PE | 26.1 | N/A                                            |

Note.— PE, pulmonary embolism; DVT, deep vein thrombosis; N/A, non-applicable

\*Reported PE location cannot be categorized as central (main or lobar) or peripheral (segmental or subsegmental).

**Table 4. Optimal cutoffs of D0dimeter for diagnosis of PE and corresponding sensitivities and specificities with varying weights in the Youden Index**

| Weights for sensitivity and specificity | optimal cutoff ( $\mu\text{g/L}$ ) | sensitivity [%, 95% CI] | specificity [%, 95% CI] |
|-----------------------------------------|------------------------------------|-------------------------|-------------------------|
| (0.5, 0.5)                              | 4453.2                             | 62 [49, 73]             | 76 [65, 84]             |
| (0.6, 0.4)                              | 2969.0                             | 72 [62, 81]             | 63 [51, 73]             |
| (0.7, 0.3)                              | 1614.9                             | 84 [77, 90]             | 40 [31, 50]             |

PE, pulmonary embolism; CI, confidence interval
